# Supplementary material for: Molecular Epidemiology of Tuberculosis in Finland, 2008-2011
Source: PubMed Central journal article supplement (PMC3873426; doi:10.1371/journal.pone.0085027), 2013-12-26

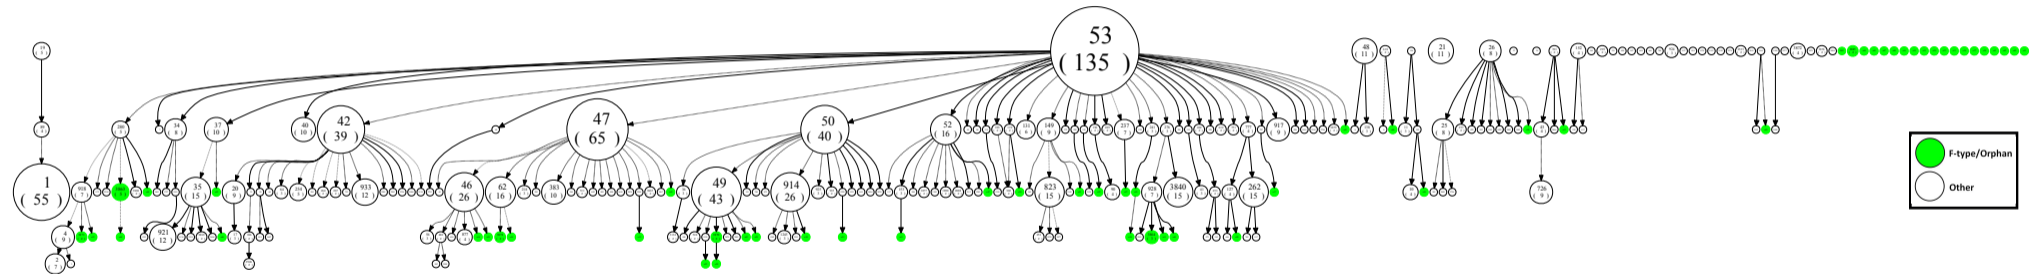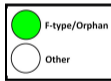

Supplement: pone.0085027.s001.pdf [file pone.0085027.s001.pdf]
